# Supplementary material for: Greening the synthesis of peptide therapeutics: an industrial perspective
Source: Royal Society of Chemistry journal article supplement (doi:10.1039/d0ra07204d), 2020-01-01
Supplement: d0ra07204d1.pdf [file d0ra07204d1.pdf]

# Identifying Industrial Strategies for the Eco-Friendly Synthesis of Therapeutic Peptides

RSC Advances

Solid-phase peptide synthesis (SPPS) is widely used to make peptides

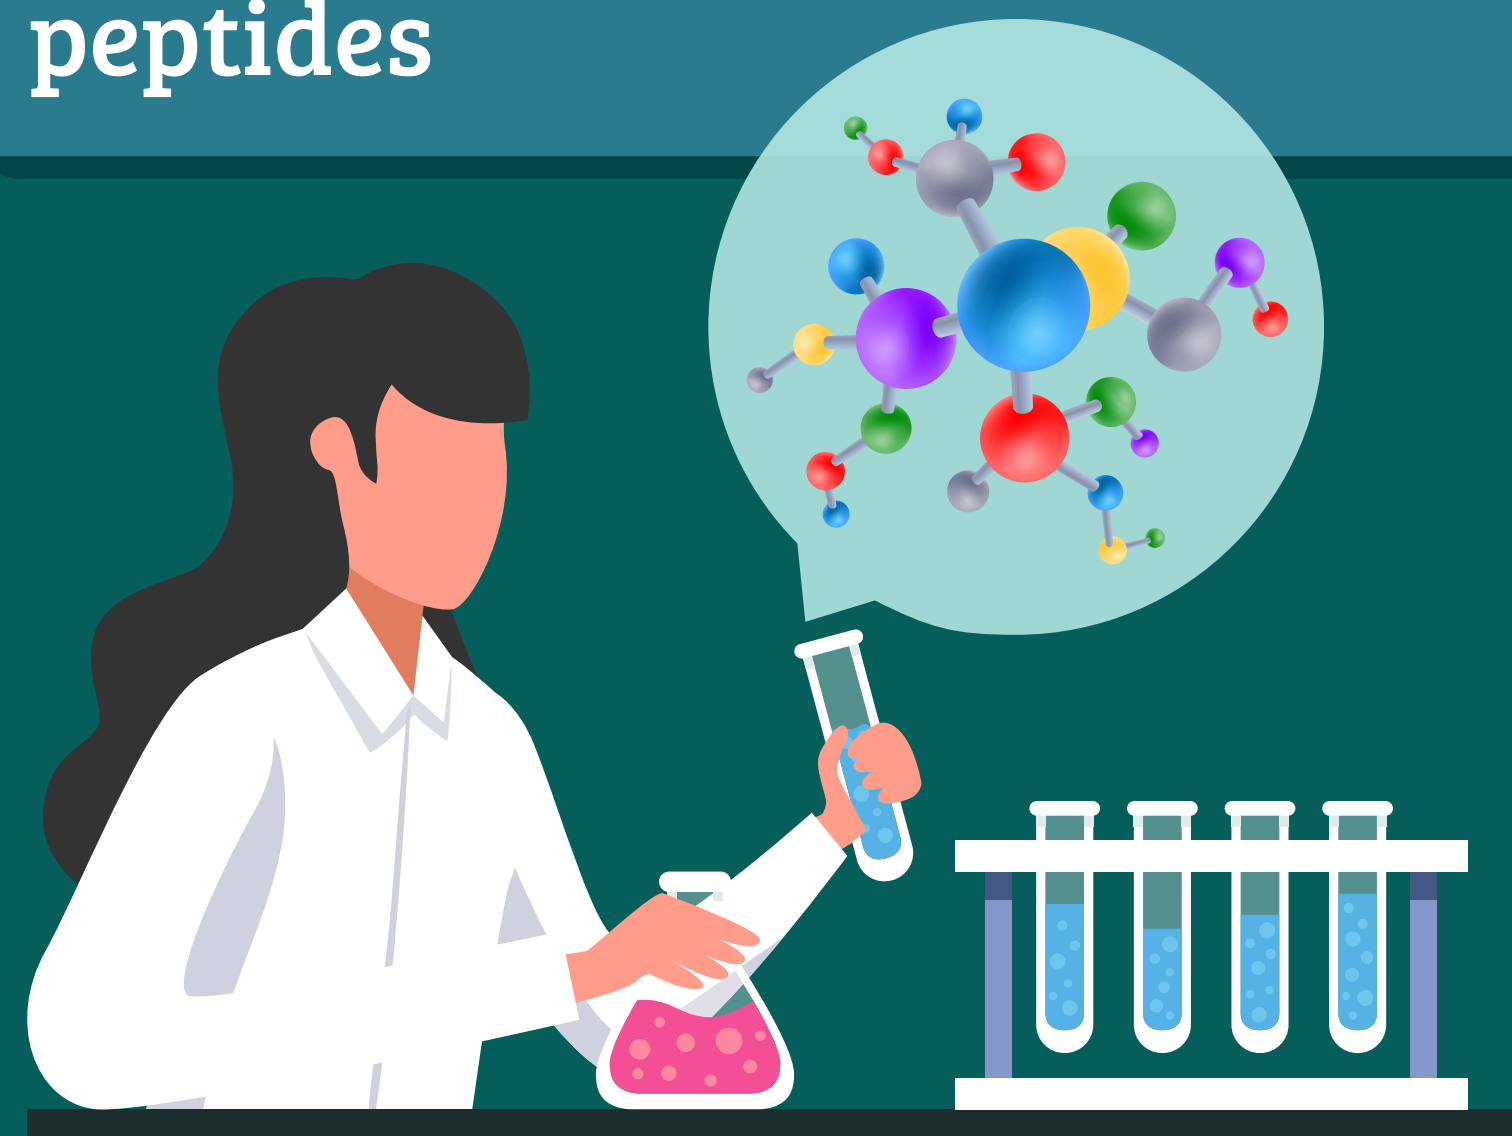

But it requires excessive amounts of environmentally problematic solvents

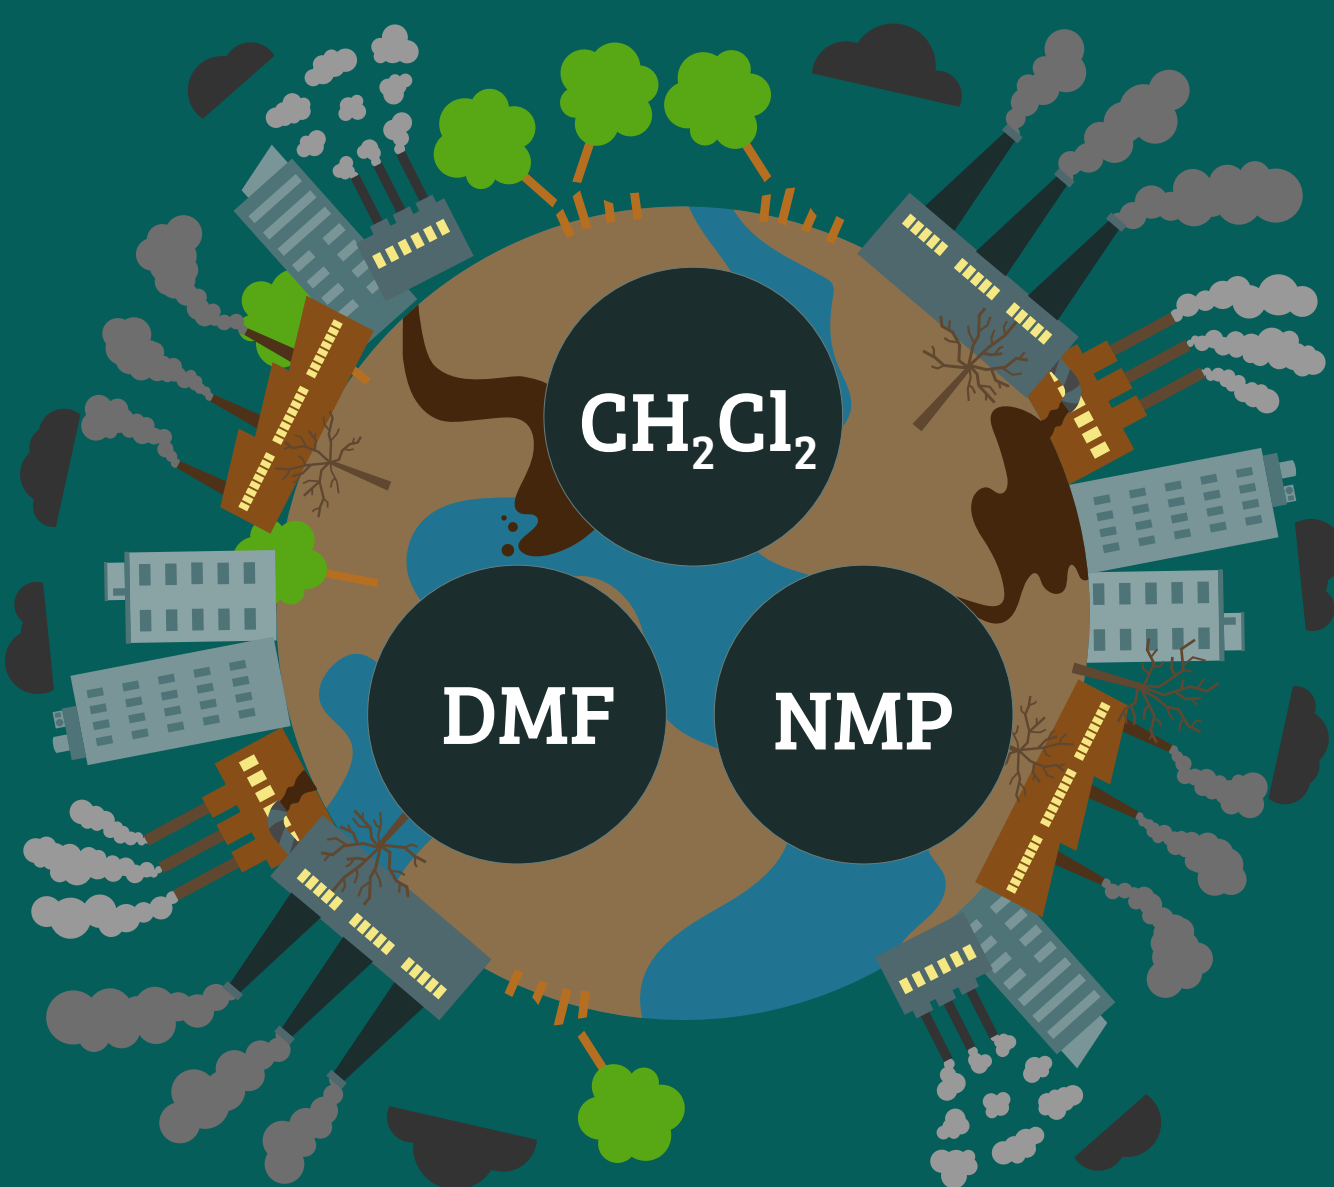

Research to mitigate these problems in large-scale SPPS lacks an industrial perspective

## Can we identify SPPS processes with relatively low environmental footprints?

### Techniques for reducing the environmental footprint of SPPS

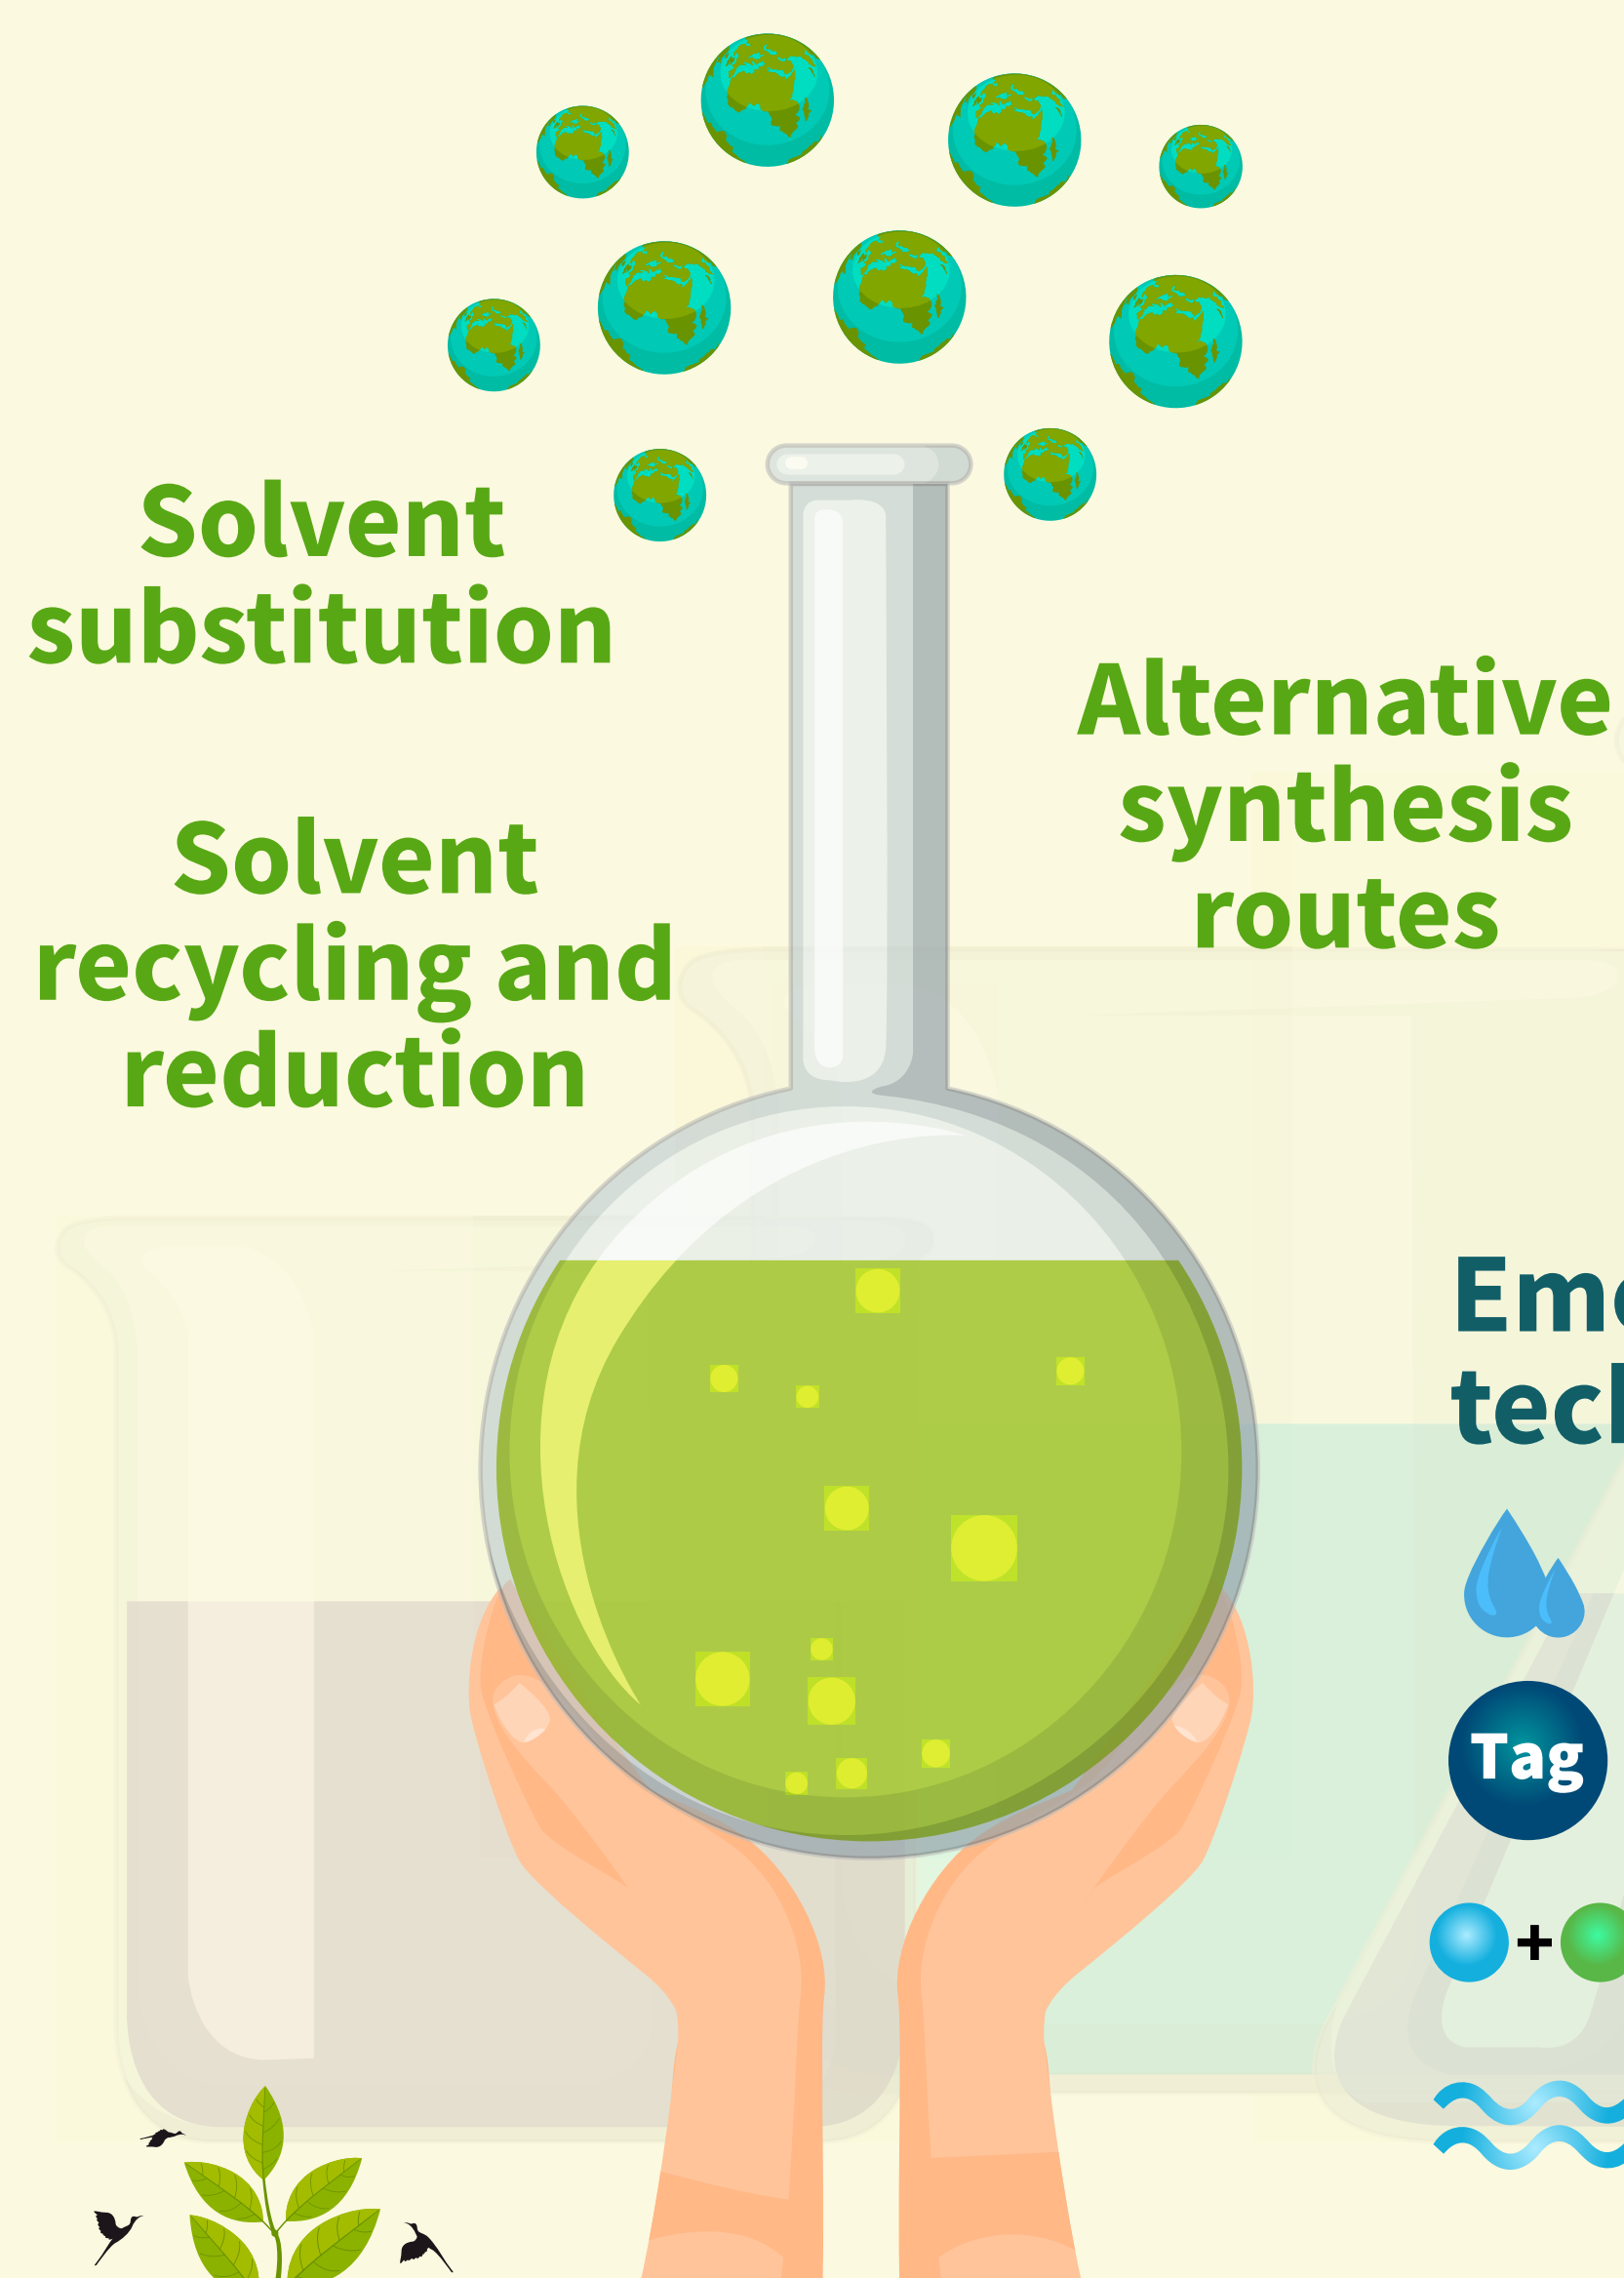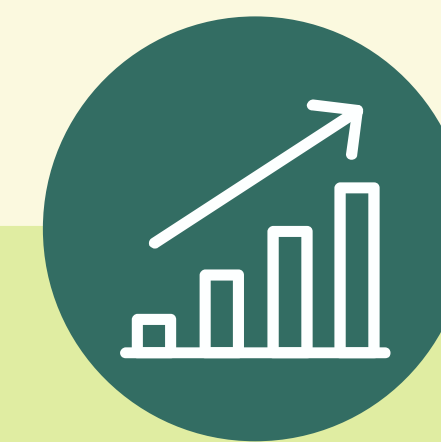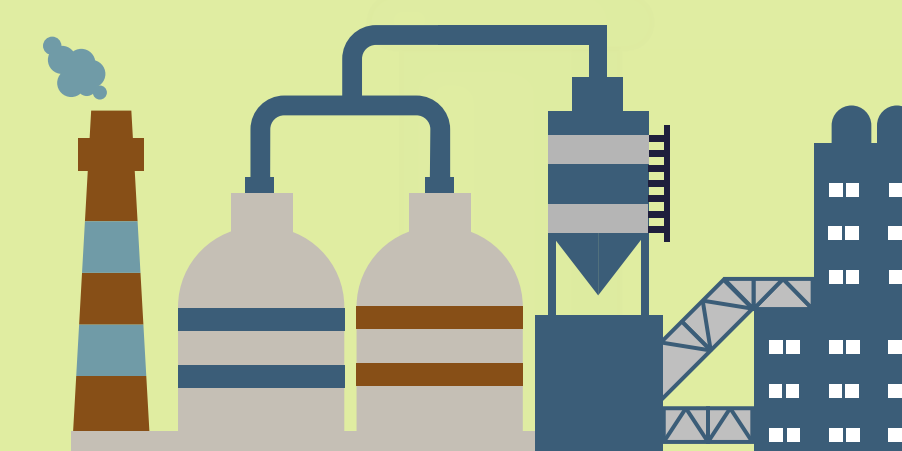

Focus on scale-up while developing greener peptide synthesis strategies

### Emerging peptide synthesis technologies

-  Water-based SPPS
-  Liquid-phase peptide synthesis
-  Protein ligation
-  Peptide synthesis in flow

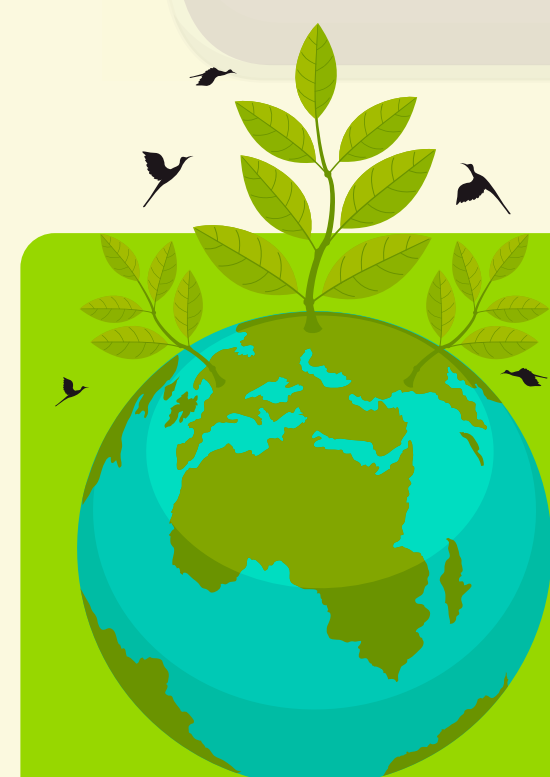

Considering an industrial perspective when designing greener approaches to peptide synthesis can simultaneously increase its sustainability and decrease its environmental impact
